# Supplementary material for: A high responsivity, high detectivity, and high response speed MSM UVB photodetector based on SnO2 microwires
Source: Royal Society of Chemistry journal article supplement (doi:10.1039/d3nr00419h), 2023-01-01
Supplement: d3nr00419h1.pdf [file d3nr00419h1.pdf]

*Supporting Information*

**A High Responsivity, High Detectivity and High Response Speed MSM  
UVB Photodetector based on SnO<sub>2</sub> Microwires**

Rongpeng Fu<sup>†a</sup>, Xue Jiang<sup>†a</sup>, Yuefei Wang<sup>a</sup>, Danyang Xia<sup>a</sup>, Bingsheng Li<sup>a,\*</sup>, Jiangang Ma<sup>a</sup>, Haiyang Xu<sup>a</sup>,

Aidong Shen<sup>b</sup>, Yichun Liu<sup>a</sup>

<sup>a</sup>Key Laboratory of UV Light Emitting Materials and Technology Under Ministry of Education, Northeast  
Normal University, Changchun 130024, P. R. China

<sup>b</sup>Department of Electrical Engineering, The City College of New York, New York 10031, USA

Corresponding Authors

\*E-mail: libs@nenu.edu.cn

<sup>†</sup>These authors contributed equally to this work.

## S1 Comparisons between the fabricated SnO<sub>2</sub> MWs in this work and other previous reports

Tab. S1 shows the comparison of the device performance parameters for this work and some previous reports. Similar with the junction type devices, the SnO<sub>2</sub> MW in this work also shows relatively low dark current and response time, which is attributed to the relatively high crystal quality and small amount of oxygen vacancies existed inside the material. While different with the reported junction type devices, SnO<sub>2</sub> MW in this work shows higher responsivity and specific detectivity, which can be attributed to the excellent performance of carrier generation and transportation.

Tab. S1 Comparisons between the fabricated SnO<sub>2</sub> MWs in this work and other previous reports.

| Material                                                          | Bias<br>V | Dark current<br>A     | Responsivity<br>A·W <sup>-1</sup> | Detectivity<br>Jones             | Response time<br>s     | Ref.             |
|-------------------------------------------------------------------|-----------|-----------------------|-----------------------------------|----------------------------------|------------------------|------------------|
| SnO <sub>2</sub> /CsPbBr <sub>3</sub>                             | 3         | 1.0×10 <sup>-10</sup> | 2.0                               | 1.2×10 <sup>13</sup>             | 1.94×10 <sup>-3</sup>  | 1                |
| SnO <sub>2</sub>                                                  | 3         | 1.0×10 <sup>-9</sup>  | --                                | --                               | 1.0                    | 2                |
| β-Ga <sub>2</sub> O <sub>3</sub> /SnO <sub>2</sub>                | 2         | 2.0×10 <sup>-9</sup>  | --                                | --                               | 28.0                   | 3                |
| SnO <sub>2</sub> /p-GaN                                           | -3        | 1.6×10 <sup>-8</sup>  | 1.45                              | 1.31×10 <sup>13</sup>            | 0.51                   | 4                |
| PEDOT:PSS/SnO <sub>2</sub>                                        | -10       | 1.1×10 <sup>-4</sup>  | 1.8×10 <sup>-3</sup>              | --                               | --                     | 5                |
| SnO <sub>2</sub> /p-InGaN                                         | 0         | --                    | 0.1                               | 3.5×10 <sup>12</sup><br>(-0.1 V) | 0.5                    | 6                |
| SnO <sub>2</sub><br><br>(322 nm,<br><br>0.25 μW/cm <sup>2</sup> ) | 10        | 3.69×10 <sup>-9</sup> | 1.353×10 <sup>3</sup>             | 5.4×10 <sup>14</sup>             | < 8.0×10 <sup>-2</sup> | This<br><br>work |

## S2 The absorption spectrum of single SnO<sub>2</sub> MW

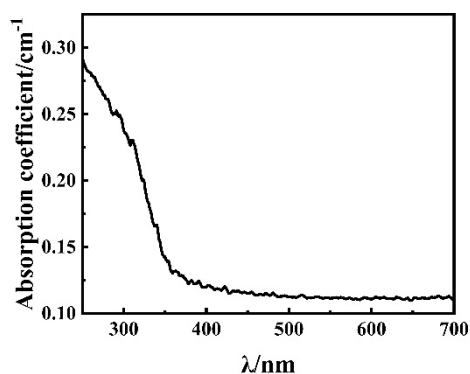

Fig. S1 Absorption spectrum of single SnO<sub>2</sub> MW

## S3 The element content and distribution of SnO<sub>2</sub> MWs

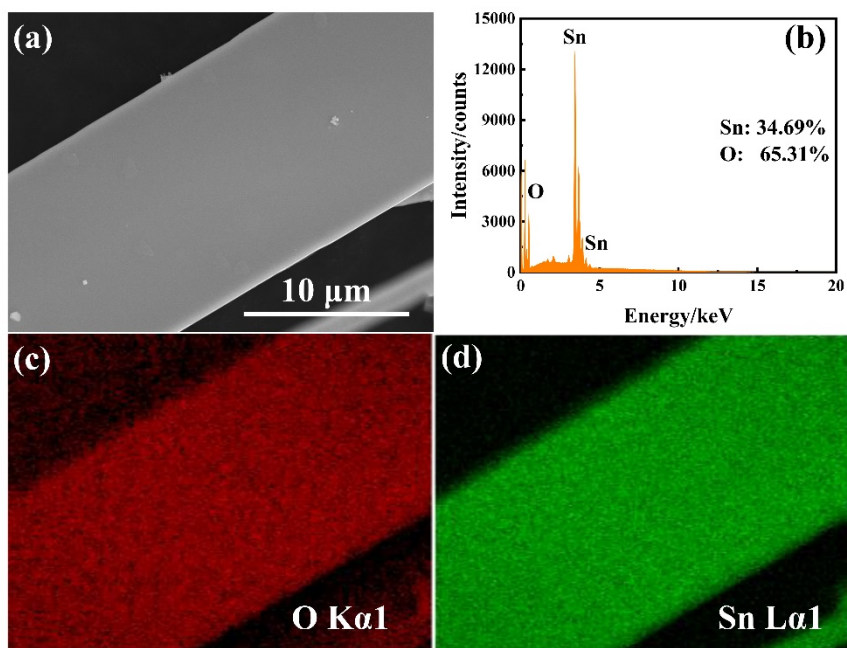

Fig. S2 (a) The SEM image of SnO<sub>2</sub> MWs; (b) the measured distribution spectrum of elements; (c - d) the measured element mappings of O and Sn elements in SnO<sub>2</sub> MWs.

## References

- 1 Y. Zhang, W. Xu, X. Xu, J. Cai, W. Yang and X. Fang, *J. Phys. Chem. Lett.*, 2019, 10, 836-841.
- 2 J. Cai, X. Xu, L. Su, W. Yang, H. Chen, Y. Zhang and X. Fang, *Adv. Opt. Mater.*, 2018, 6, 1800213.

3 K. Liu, M. Sakurai and M. Aono, *J. Mater. Chem.*, 2012, 22, 12882-12887.

4 T. Xu, M. Jiang, P. Wan, K. Tang, D. Shi and C. Kan, *Photonics Res.*, 2021, 9, 2475-2485.

5 S. Li, S. Wang, K. Liu, N. Zhang, Z. Zhong, H. Long and G. Fang, *Appl. Phys. A*, 2015, 119, 1561-1566.

6 Y. Zhang, T. Xu, K. Chang, S. Cao, P. Wan, D. Shi, C. Kan and M. Jiang, *Results Phys.*, 2022, 42, 105995.
